# Supplementary material
Source: publisher figshare collection journal article supplement (https://tandf.figshare.com/ndownloader/files/25732356)
Supplement: Supplementary file 1 [file 25732356]

**TABLE S2. Tissue factor (TF) expression**

| **Sample** | **MP-TF**  **(pg/mL)** |
| --- | --- |
| **FTPL** |  |
| **PPL** |  |
| **HPPL** |  |
| **SCPL** |  |
| **HSCPL** |  |

limit detection of the assay pg/mL
